# Supplementary material for: An environmentally friendly etching agent: vapor from hot electron-activated liquid water
Source: Royal Society of Chemistry journal article supplement (doi:10.1039/c6gc00353b), 2016-01-01

## Supplementary Information

### Environmentally friendly etching agent: vapor from hot electron-activated liquid water

Hsiao-Chien Chen,<sup>a</sup> Fu-Der Mai,<sup>ab</sup> Kuang-Hsuan Yang,<sup>c</sup> Hui-Yen Tsai,<sup>a</sup> Chih-Ping Yang,<sup>d</sup>

Chien-Chung Chen,<sup>e</sup> Chao-Hsuan Chen<sup>e</sup> and Yu-Chuan Liu<sup>\*ab</sup>

<sup>a</sup>Department of Biochemistry and Molecular Cell Biology, School of Medicine, College of Medicine, Taipei Medical University No. 250, Wuxing St., Taipei 11031, Taiwan. E-mail: [liuyc@tmu.edu.tw](mailto:liuyc@tmu.edu.tw)

<sup>b</sup>Biomedical Mass Imaging Research Center, Taipei Medical University, No. 250, Wuxing St., Taipei 11031, Taiwan.

<sup>c</sup>Department of Materials Science and Engineering, Vanung University, 1 Van Nung Rd., Chungli City, Taiwan

<sup>d</sup>Graduate Institute of Medical Science, College of Medicine, Taipei Medical University, 250 Wuxing St., Taipei 11031, Taiwan

<sup>e</sup>Graduate Institute of Biomedical Materials and Tissue Engineering, College of Oral Medicine, Taipei Medical University, 250 Wuxing St., Taipei 11031, Taiwan

## FIGURE CAPTIONS

**Figure S1.** Photo image showing the etching of glass by hot electron-activated (HEA) water vapor.

**Figure S2.** Cross-sectional SEM images of silicate glass sheets etched in atmospheres containing DI water or HEA water vapor at room temperature for 3 h. (a) A blank glass sheet without etching treatment was used for a reference. (b) An etched glass sheet based on DI water. (c) An etched glass sheet based on HEA water.

**Figure S3.** Photo image of a deionized (DI) water-wetted glass bottle (lower part near bottom) in direct contact with hot electron-activated (HEA) water for 3 h.

**Figure S4.** Contact angles measured on silicate glass sheets from (a) blank glass sheet without etching treatment was used for a reference, (b) etched glass sheet based on DI water and (c) etched glass sheet based on HEA water.

**Figure S5.** AFM images of high-grade silicate glass sheets, which are used in the photoelectric industry, etched by different methods. (a) A blank glass sheet without etching treatment was used for a reference. (b) Glass conventionally etched in 1 M of NaOH for 3 h. (c) Glass etched in an atmosphere containing hot electron-activated (HEA) water vapor at room temperature for 3 h.

**Figure S6.** AFM images of (a) a silicon wafer and (b) a silicon wafer etched in an atmosphere containing hot electron-activated (HEA) water vapor at room temperature for 3 h.

**Figure S7.** Zeta potential of HEA water.

**Figure S8.** Zeta potential of DI water.

**Figure S9.** SERS spectra of R6G with different concentrations ( $2 \times 10^{-6}$  to  $2 \times 10^{-14}$  M) adsorbed on Au film-deposited (a) blank and (b) etched glass substrates.

**Figure S10.** UV-vis absorption spectra of Au film-deposited blank and etched glass substrates. Measurements were performed at three different spots on the same substrate.

**Figure S11.** Calculated relative standard deviations (RSDs) based on SERS intensities of R6G of the strongest bands (at ca. 1506  $\text{cm}^{-1}$ ) at three selected spots on the same Au film-deposited blank and etched glass substrates in three different batch experiments. The etching experiment was performed in an atmosphere containing hot electron-activated (HEA) water vapor at room temperature for 3 h, and the corresponding SERS spectra of  $2 \times 10^{-6}$  M R6G adsorbed onto them were recorded.

**Figure S12.** Optical microscopic images of crosshatch examinations of crosscut adhesion tests of 20-nm Au films deposited on silicate glass sheets without etching and with etching (before Au deposition) in an atmosphere containing hot electron-activated (HEA) water vapor at room temperature for 3 h. (a), (b), and (c) Au films deposited on blank glass sheets. (d), (e), and (f) Au films deposited on etched glass sheets.

**Figure S1**

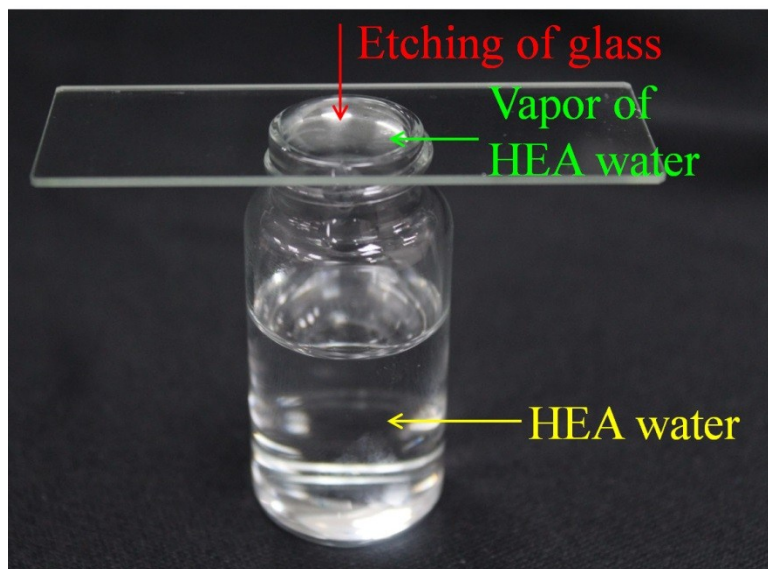

**Figure S2**

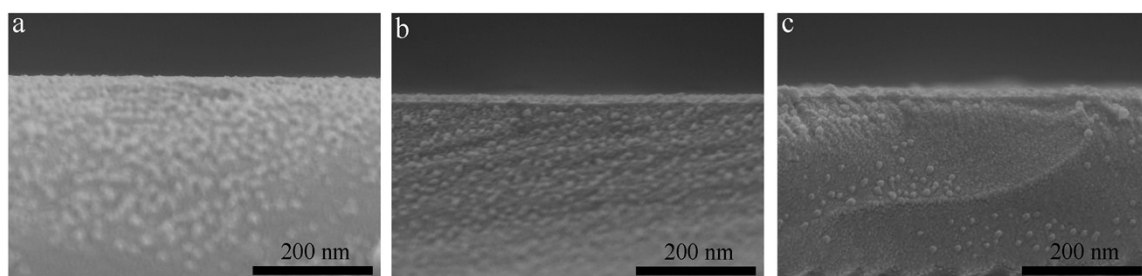

**Figure S3**

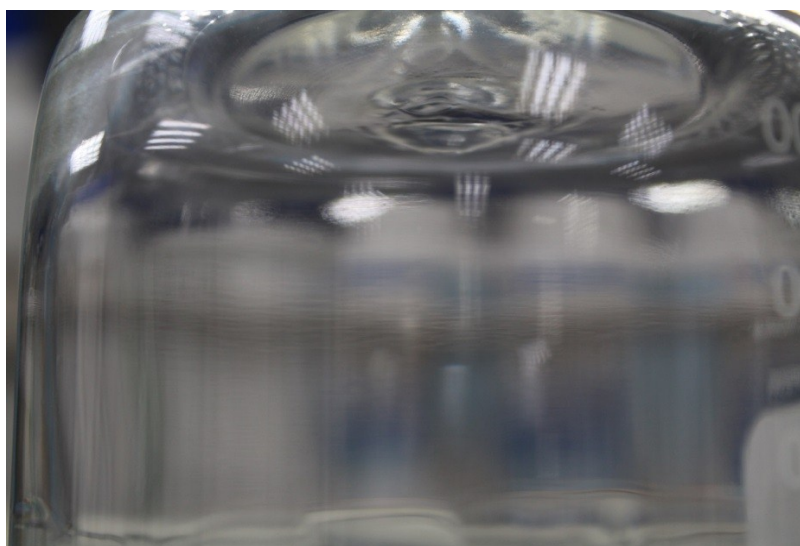

**Figure S4**

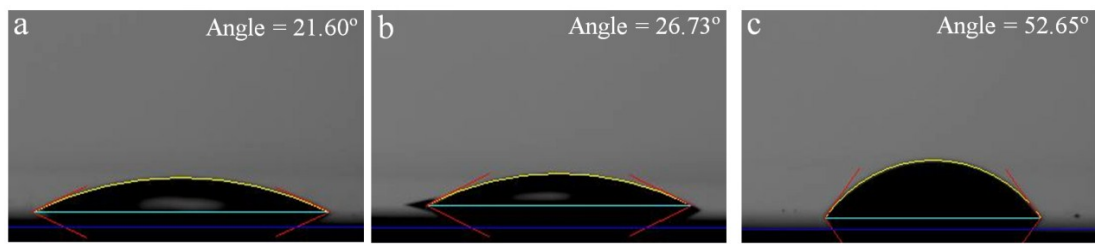

**Figure S5**

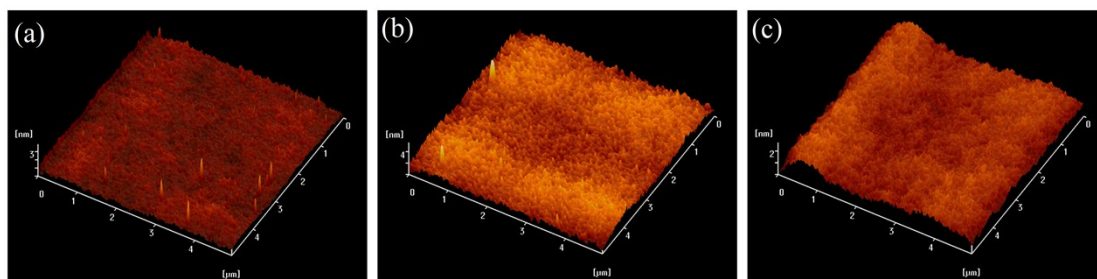



**Figure S6**

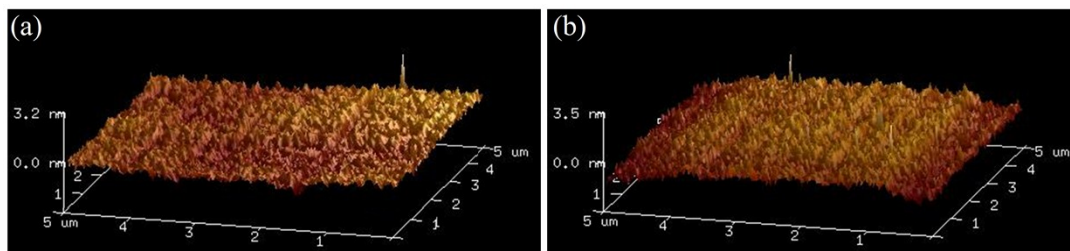

**Figure S7**

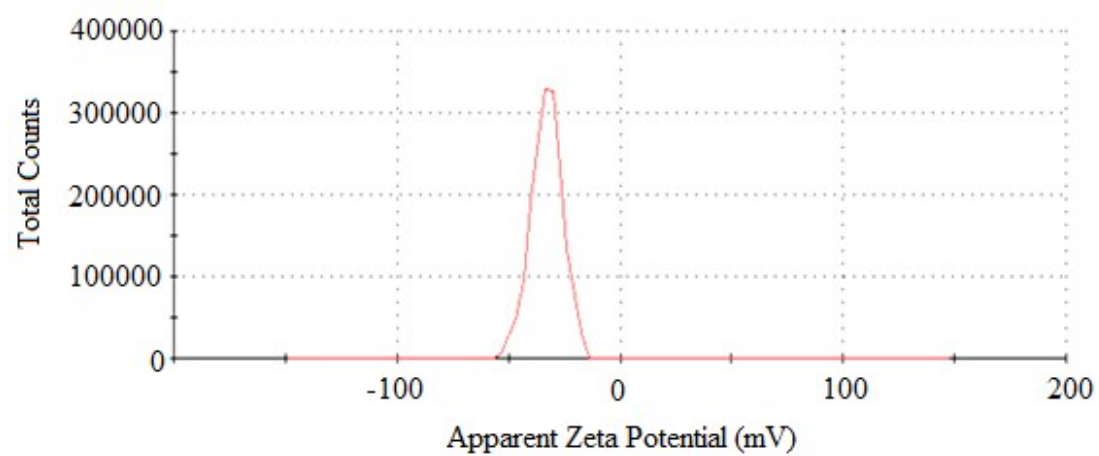

**Figure S8**

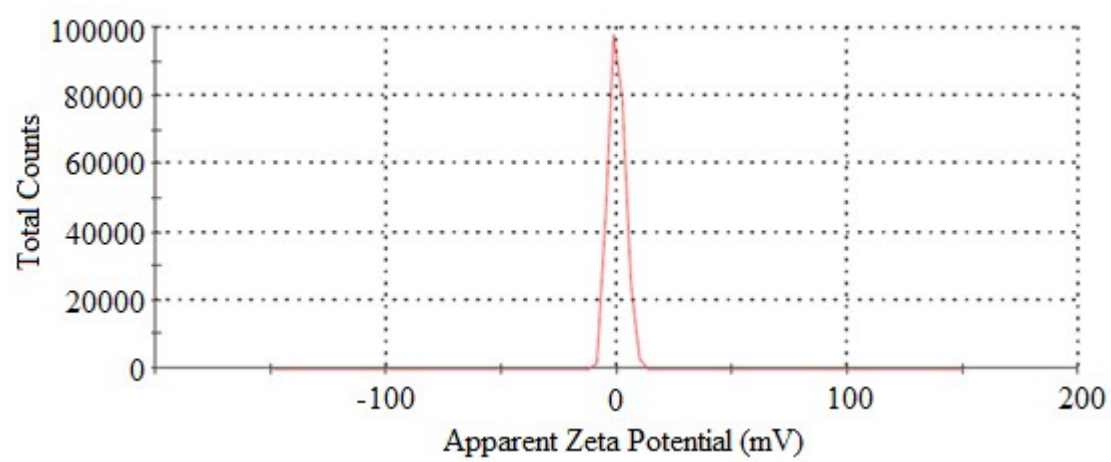

**Figure S9**

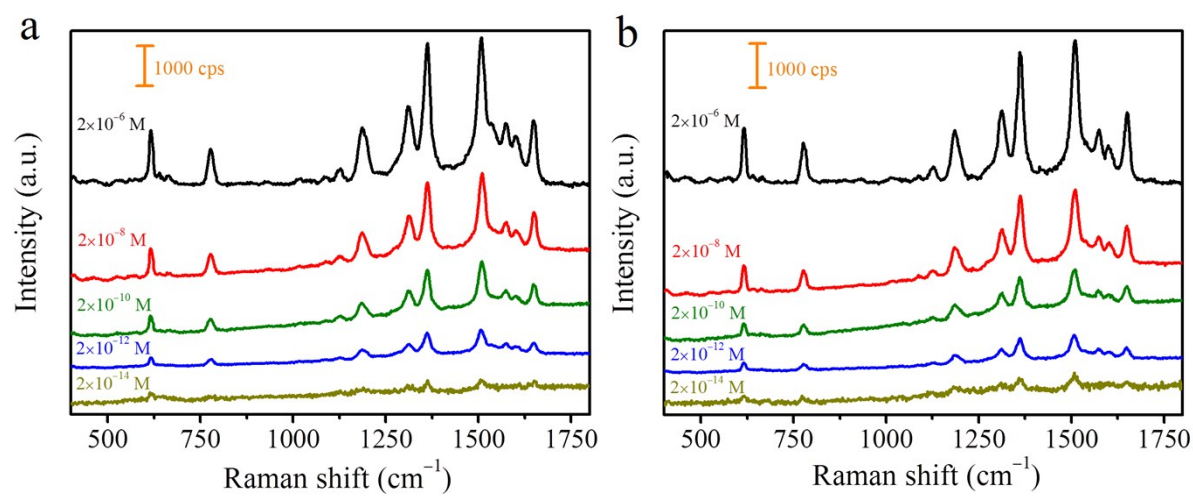

Figure S10

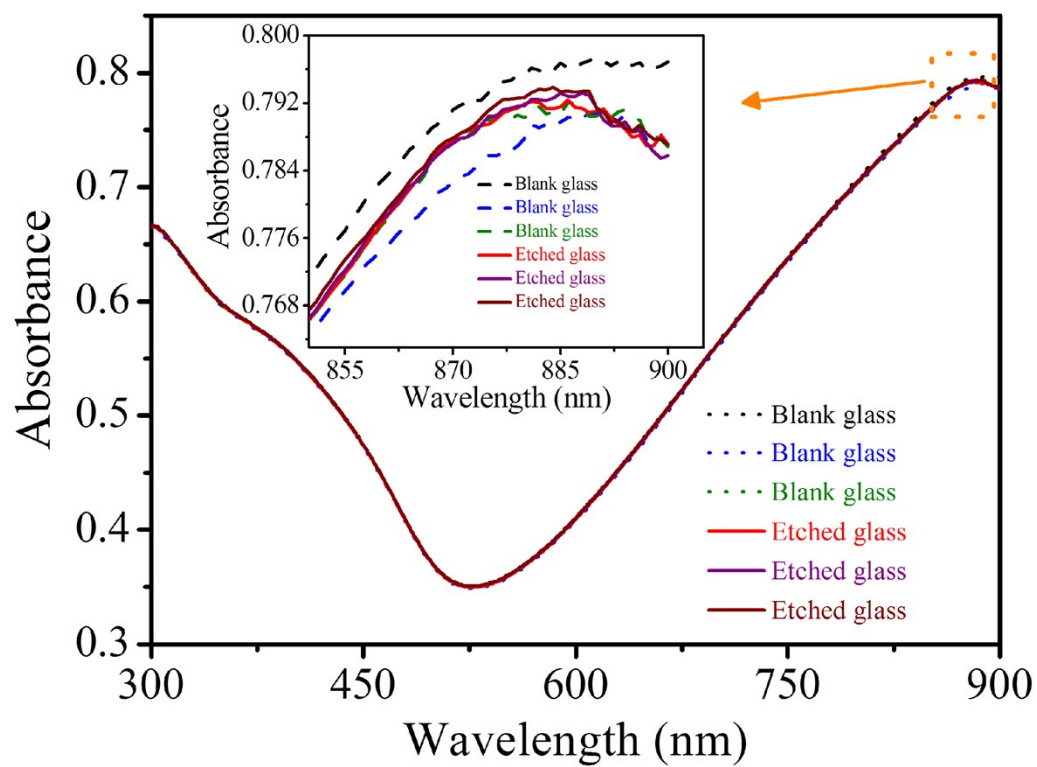

Figure S11

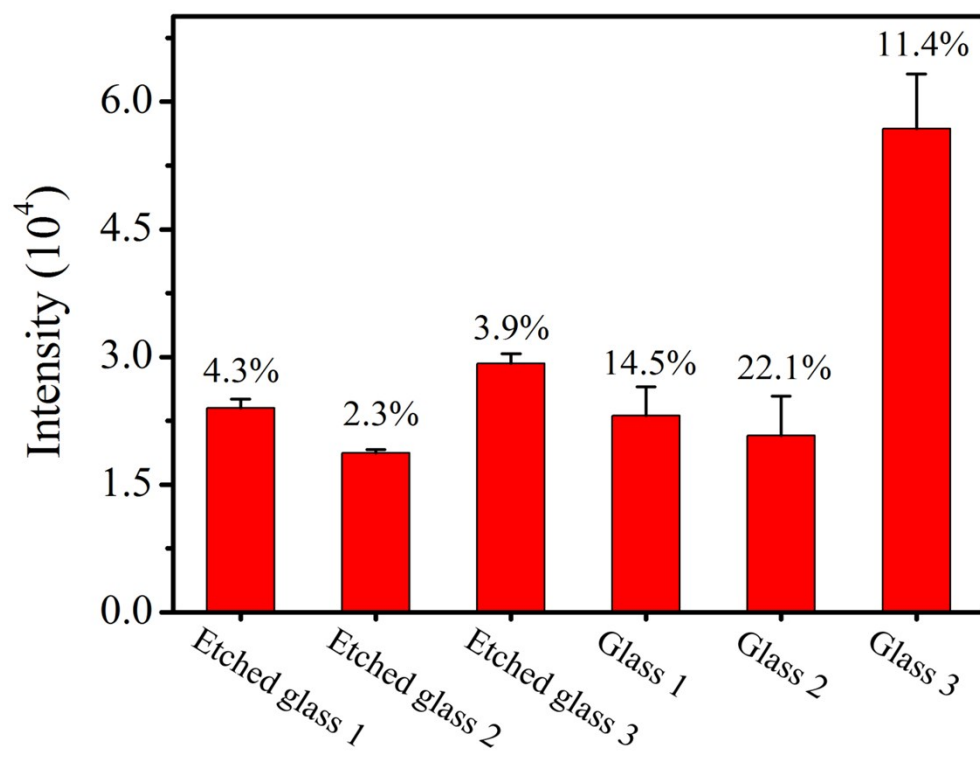

**Figure S12**

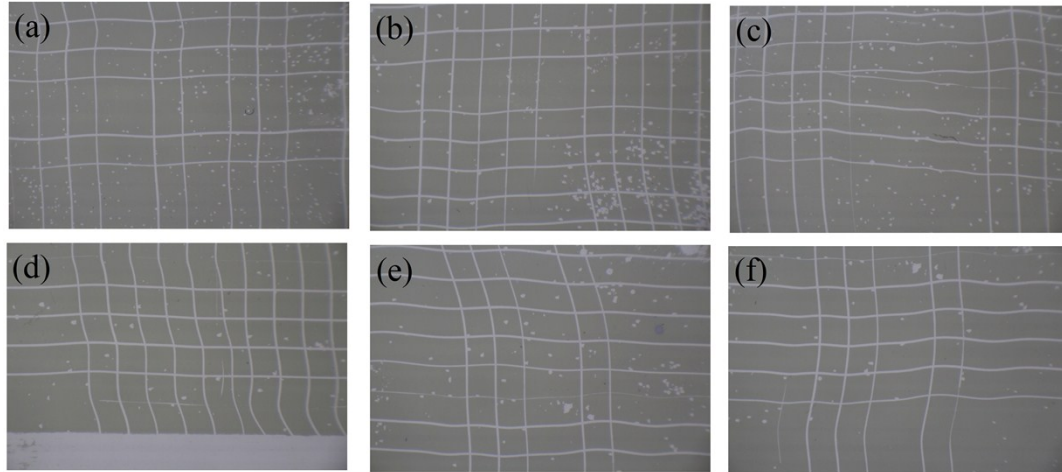

Supplement: c6gc00353b1.pdf [file c6gc00353b1.pdf]
